# Supplementary material for: Analysis of phylogenomic datasets reveals conflict, concordance, and gene duplications with examples from animals and plants
Source: PubMed Central journal article supplement (PMC4524127; doi:10.1186/s12862-015-0423-0), 2015-08-05

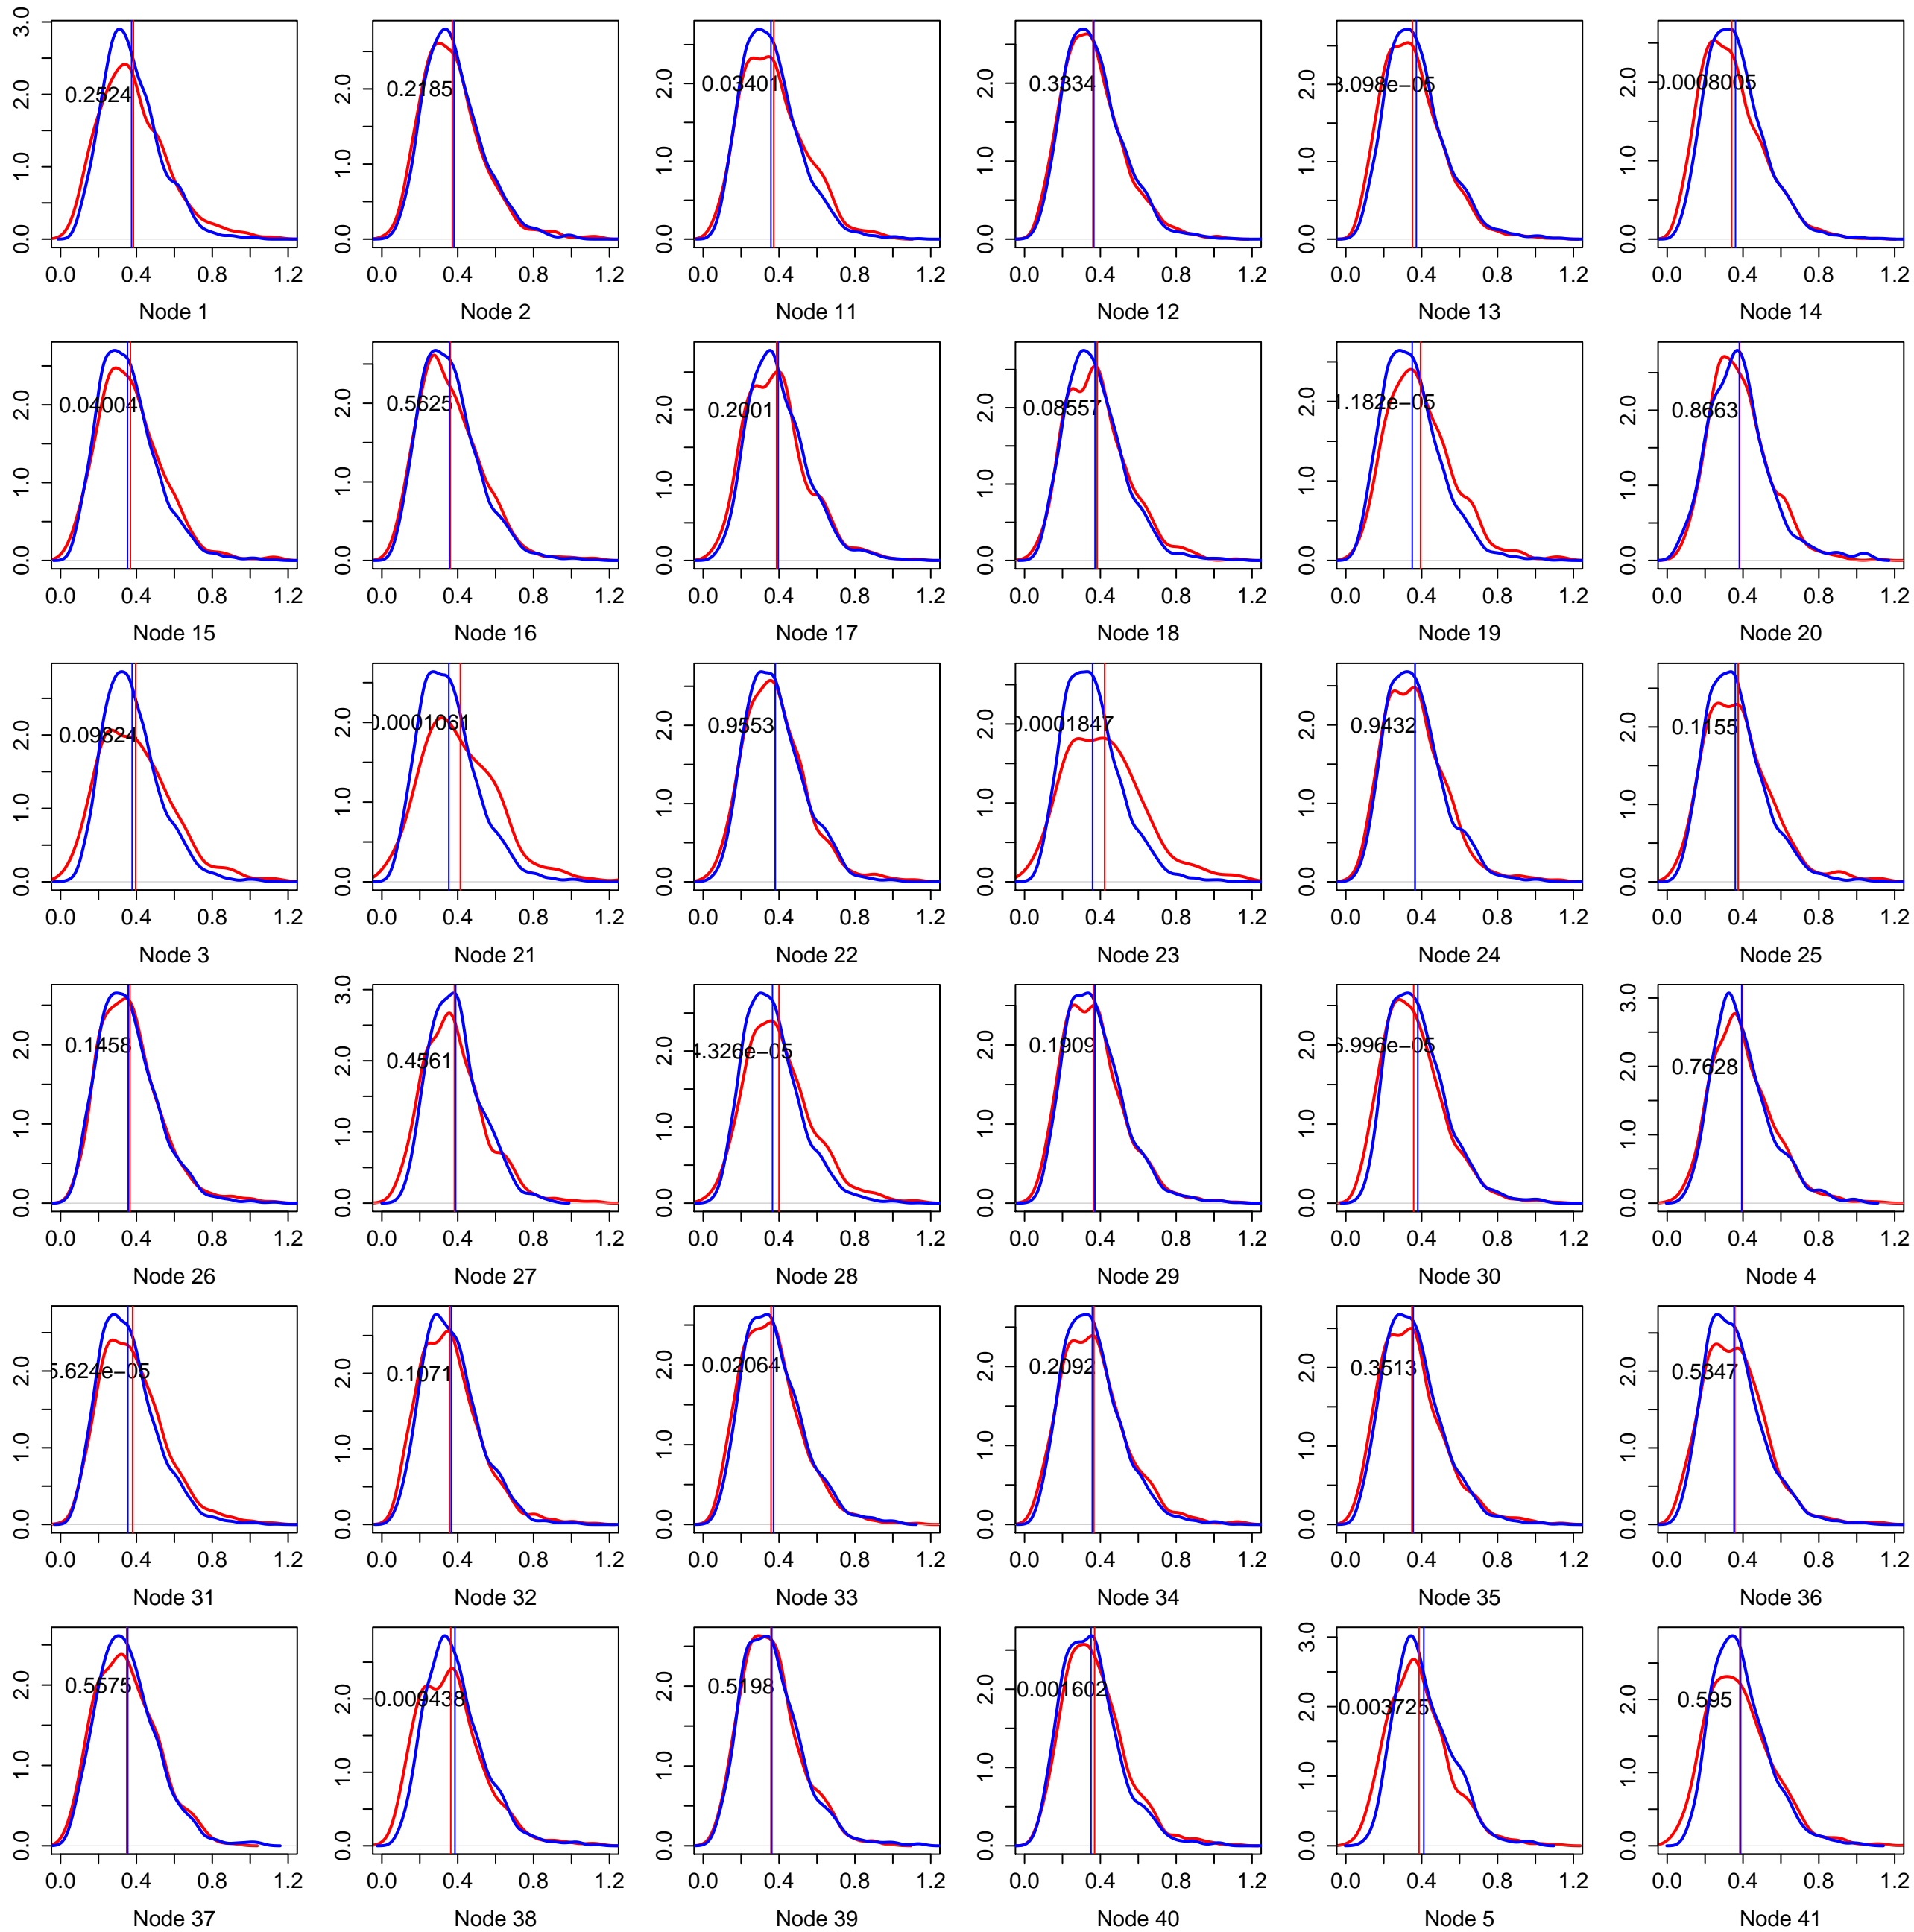

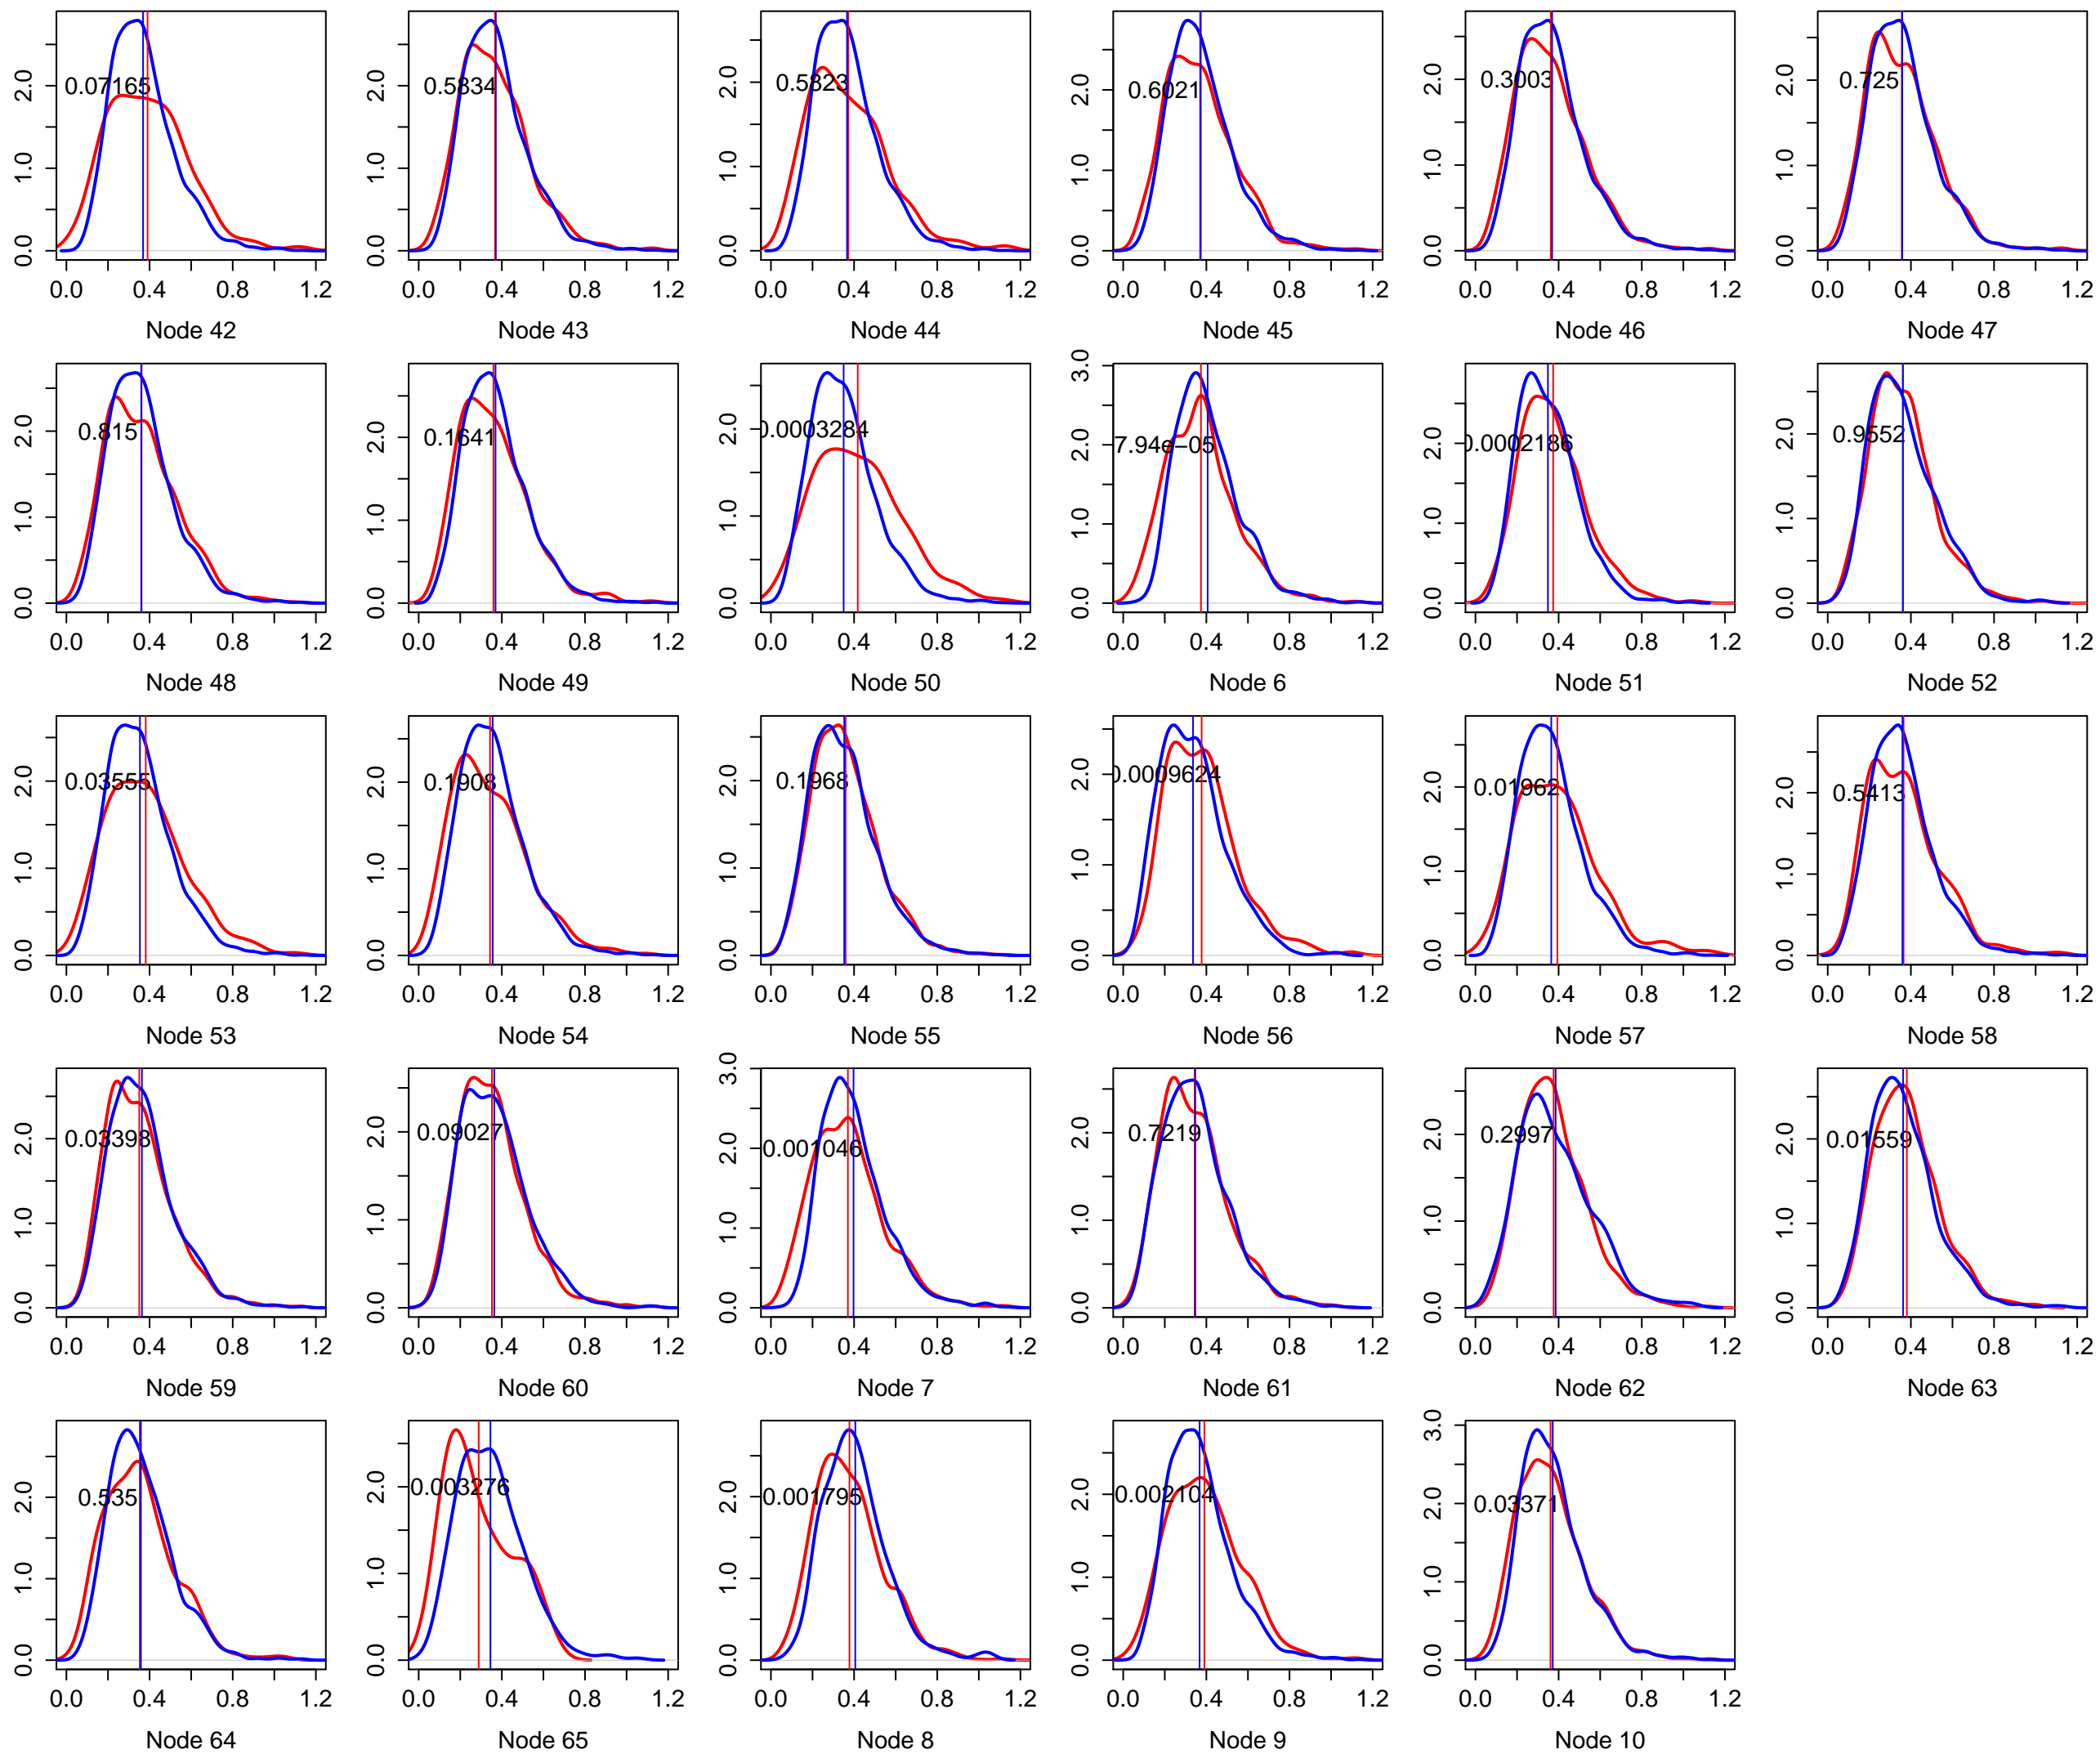

Supplement: 12862_2015_423_MOESM10_ESM.pdf [file 12862_2015_423_MOESM10_ESM.pdf]
